# Supplementary material
Source: Springer Nature journal article supplement (https://www.springermedizin.de/resource/supplementary/13011_2012_222_MOESM1_ESM.pdf/9628644)

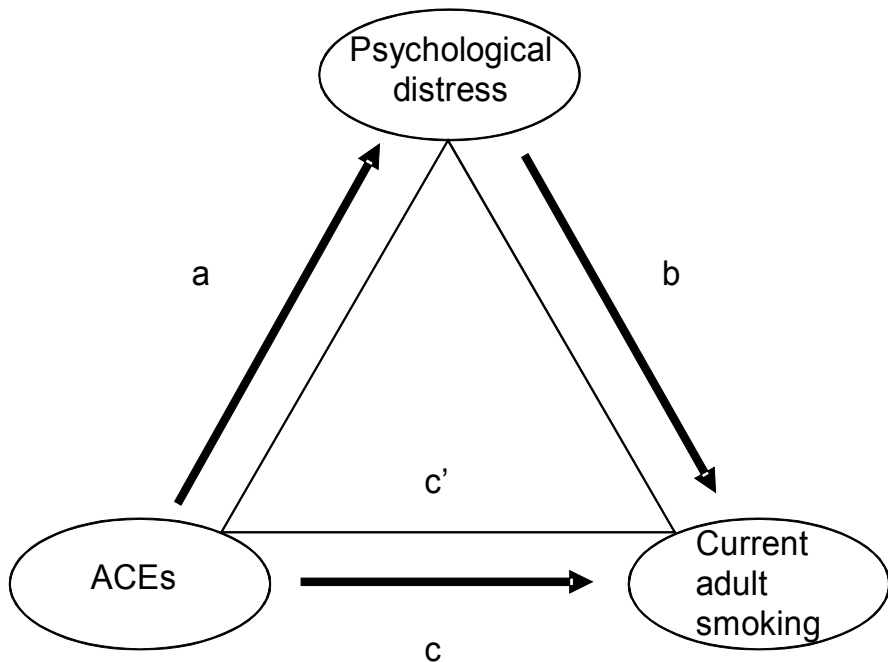

b and c' = both ACE(s) and psychological distress in the model.

Supplement: MOESM1 [file 9628644]
